**PRACTICE**

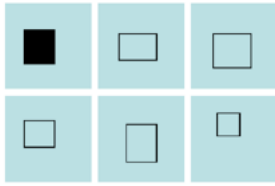

Trial 1

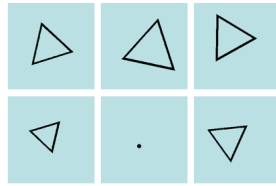

Trial 2

**BLOCK 1 – Recipient: Self**

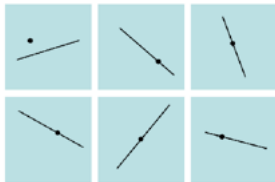

Trial 1

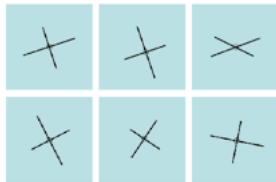

Trial 2

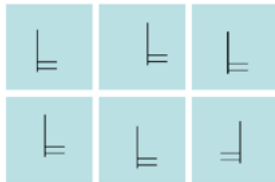

Trial 3

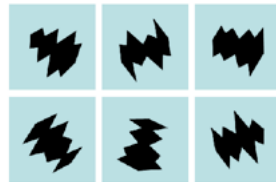

Trial 4

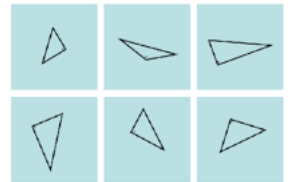

Trial 5

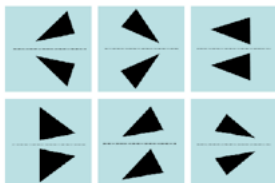

Trial 6

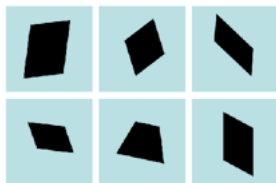

Trial 7

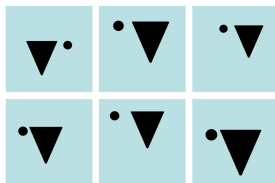

Trial 8

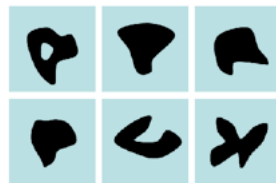

Trial 9

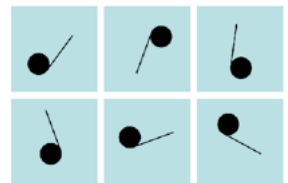

Trial 10

**BLOCK 2 – Recipient: Sibling, Parent, Friend, or Stranger**

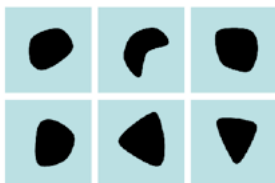

Trial 1

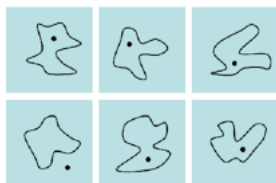

Trial 2

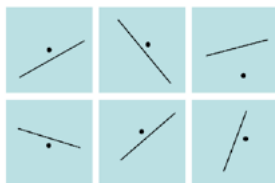

Trial 3

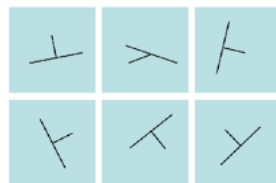

Trial 4

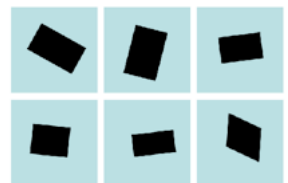

Trial 5

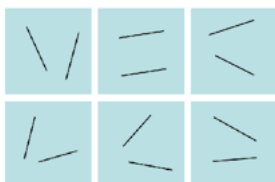

Trial 6

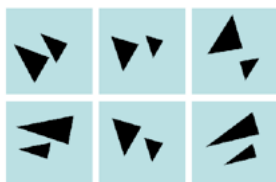

Trial 7

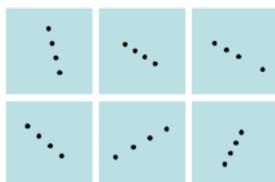

Trial 8

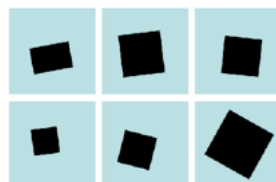

Trial 9

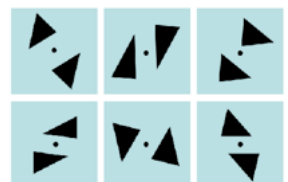

Trial 10

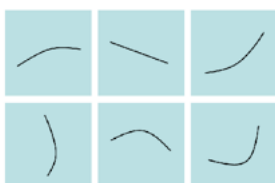

Trial 11

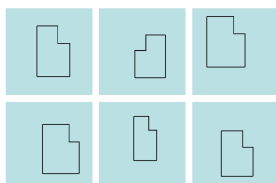

Trial 12

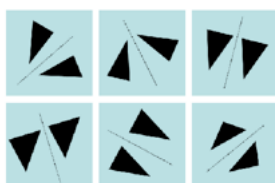

Trial 13

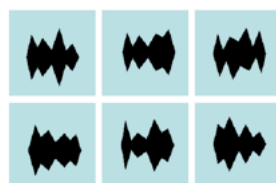

Trial 14

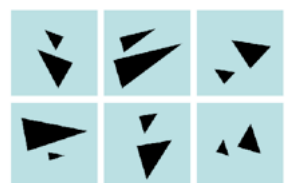

Trial 15

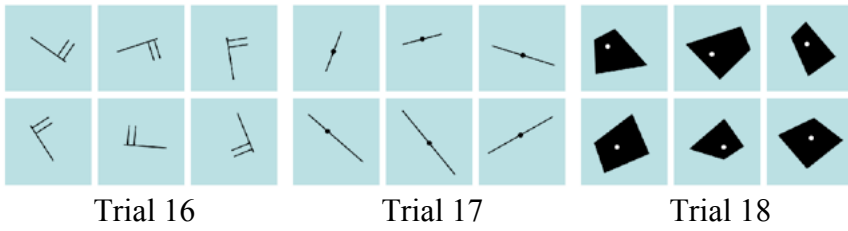

Trial 16

Trial 17

Trial 18

**BLOCK 3 – Recipient: Sibling, Parent, Friend, or Stranger**

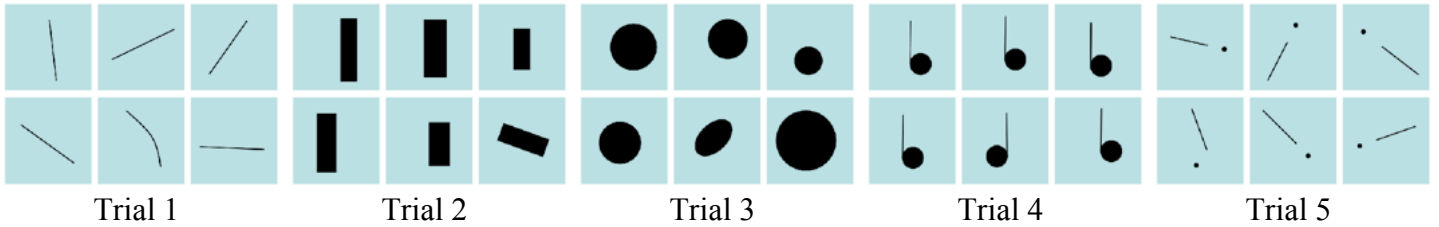

Trial 1

Trial 2

Trial 3

Trial 4

Trial 5

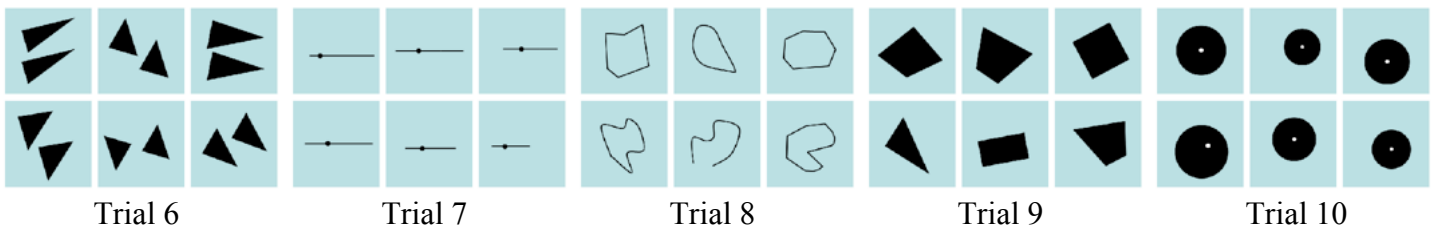

Trial 6

Trial 7

Trial 8

Trial 9

Trial 10

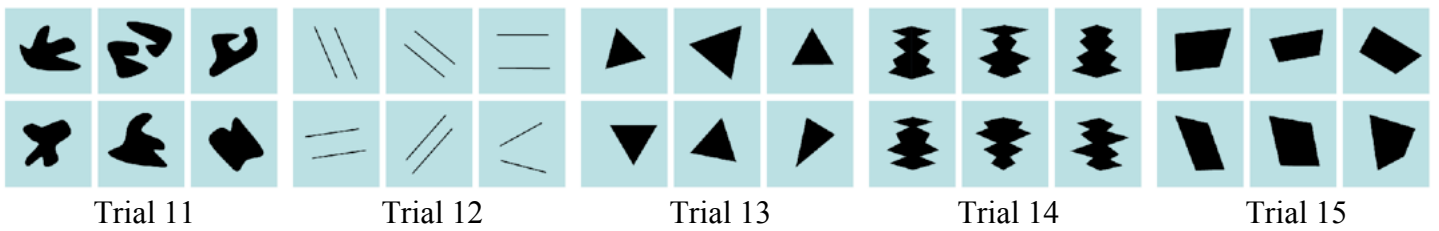

Trial 11

Trial 12

Trial 13

Trial 14

Trial 15

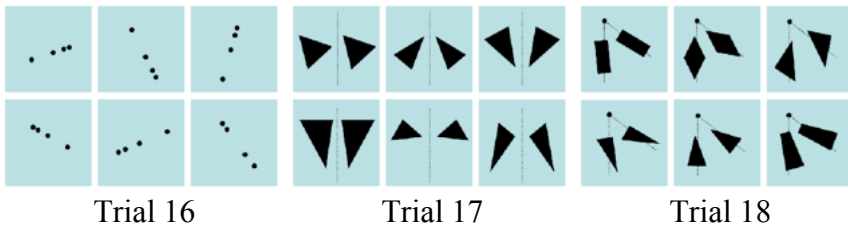

Trial 16

Trial 17

Trial 18
